# Supplementary material for: A Complete Pipeline for Untargeted Urinary Volatolomic Profiling with Sorptive Extraction and Dual Polar and Nonpolar Column Methodologies Coupled with Gas Chromatography Time-of-Flight Mass Spectrometry
Source: PubMed Central journal article supplement (PMC9850407; doi:10.1021/acs.analchem.2c02873), 2023-01-05
Supplement: ac2c02873_si_001.pdf [file ac2c02873_si_001.pdf]

## Supporting Information

### A Complete Pipeline for Untargeted Urinary Volatolomic Profiling with Sorptive Extraction and GC-TOF-MS

Qing Wen<sup>1§</sup>, Antonis Myridakis<sup>1§</sup>, Piers R. Boshier<sup>1</sup>, Simone Zuffa<sup>2</sup>, Ilaria Belluomo<sup>1</sup>, Aaron G. Parker<sup>1</sup>, Sung-Tong Chin<sup>1</sup>, Stephanie Hakim<sup>1</sup>, Sheraz R. Markar<sup>1,3</sup>, and George B. Hanna<sup>1\*</sup>

<sup>1</sup> Department of Surgery and Cancer, Imperial College London, London W12 0HS, United Kingdom

<sup>2</sup> Department of Metabolism, Digestion and Reproduction, Imperial College London, London SW7 2AZ, United Kingdom

<sup>3</sup> Nuffield Department of Surgical Sciences, University of Oxford, Oxford, OX3 9DU, United Kingdom

\* Email: g.hanna@imperial.ac.uk

§ Q.W. and A.M. contributed equally to this paper.

#### TABLE OF CONTENTS

|                                                                                                            |     |
|------------------------------------------------------------------------------------------------------------|-----|
| Figure S1. Evaluation of headspace analysis versus immersive analysis.                                     | S2  |
| Figure S2. Evaluation of osmolality normalization for urine density correction.                            | S3  |
| Figure S3. ROC curves for PDAC versus controls.                                                            | S4  |
| Figure S4. Candidate biomarker confirmation with authentic standards.                                      | S5  |
| Table S1. Characteristics of the study cohort.                                                             | S6  |
| Table S2. List of VOCs from urine of healthy individuals identified by the optimal polar GC-TOF assay.     | S7  |
| Table S3. List of VOCs from urine of healthy individuals identified by the optimal non-polar GC-TOF assay. | S10 |
| Details on data pre-processing for the application in PDAC patients and controls.                          | S15 |
| Table S4. Number of reliably measured VOCs after data pre-processing and feature filtering.                | S15 |
| Table S5. List of urinary VOCs with variable importance projection score (VIP) > 1.5.                      | S16 |
| References                                                                                                 | S18 |

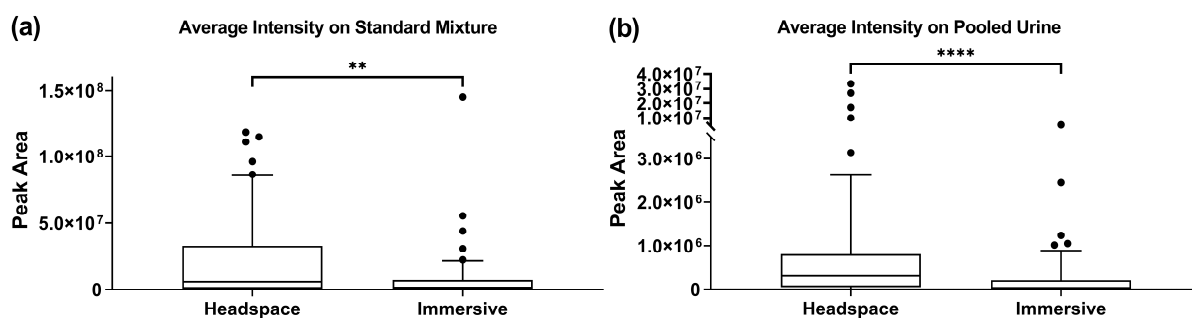

**Figure S1. Evaluation of headspace analysis versus immersive analysis.**

(a) Average peak area of VOCs in a mixture of VOC standards spiked in water. (b) Average peak area of VOCs in urine. Mann-Whitney U test was used for comparison. Boxplots represent lower, upper quartile, and interquartile range (IQR); whiskers represent 10-90 percentile; \*:  $p < 0.05$ , \*\*:  $p < 0.01$ , \*\*\*:  $p < 0.001$ , \*\*\*\*:  $p < 0.0001$ .

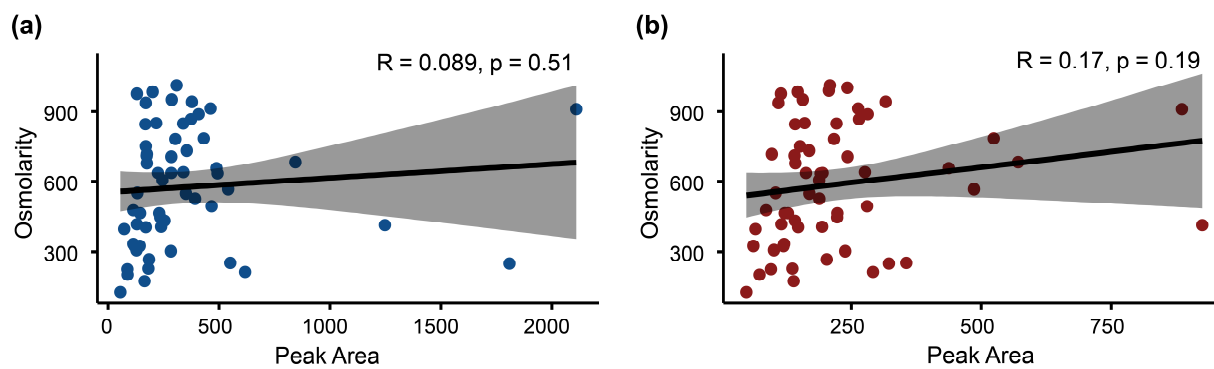

**Figure S2. Evaluation of osmolality normalization for urine density correction.**

(a) Polar dataset, (b) non-polar dataset. No correlation between sample peak areas and osmolality was observed using Pearson correlation.

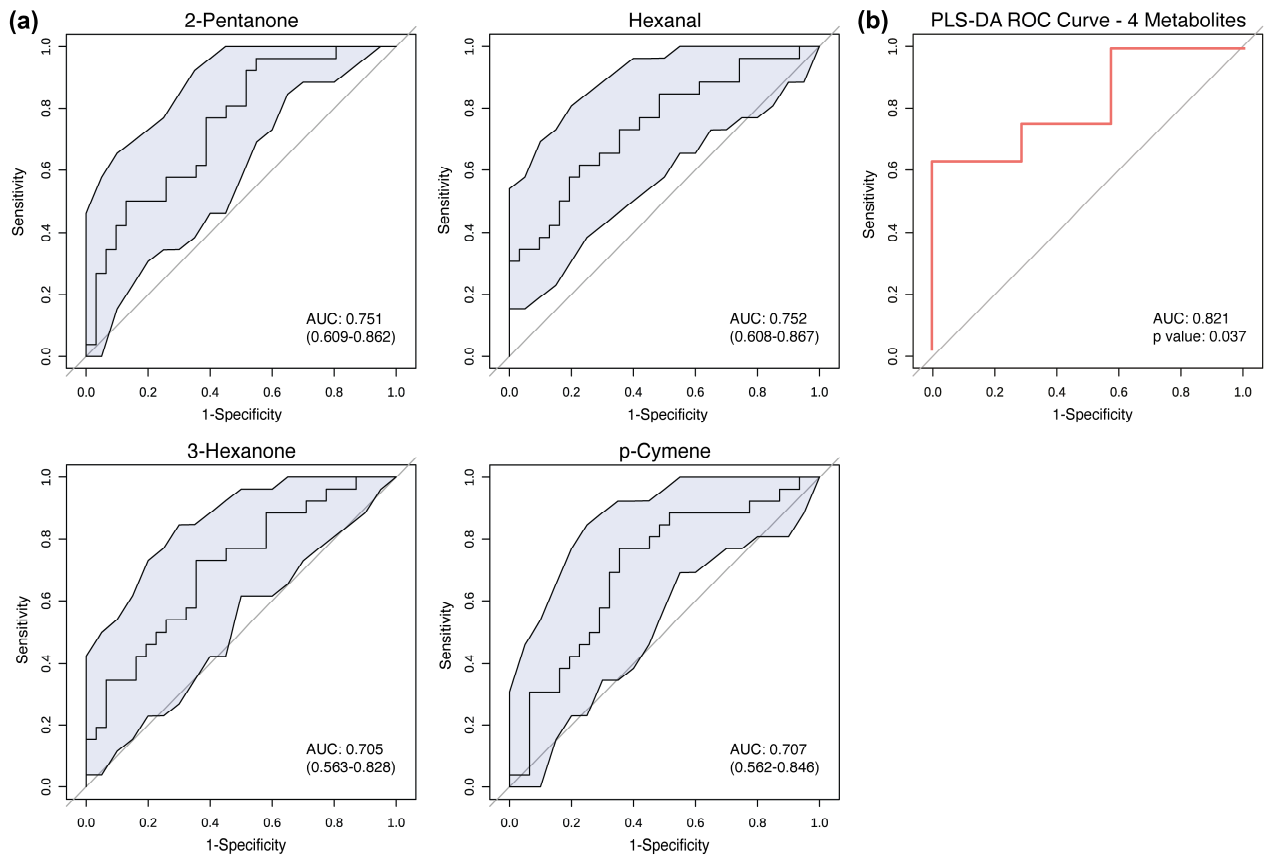

**Figure S3. ROC curves for PDAC versus controls.**

ROC curves were built (a) for each of the four endogenous metabolites with highest variable importance projection scores (VIPs), including 2-pentanone, hexanal, 3-hexanone, and p-cymene; and (b) for all of them combined.

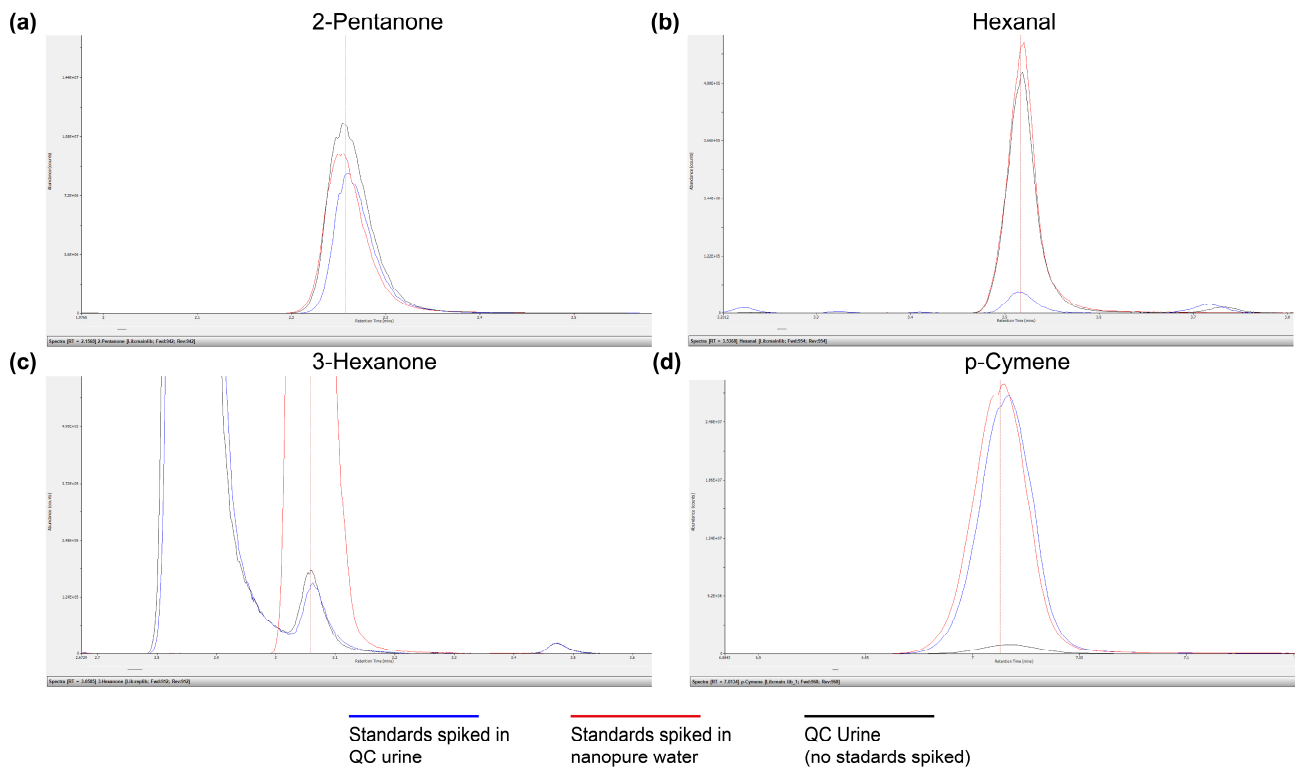

**Figure S4. Candidate biomarker confirmation with authentic standards.**

Original standards including (a) 2-pentanone, (b) hexanal, (c) 3-hexanone, and (d) p-cymene were analyzed in: Blue: spiked in pooled urine; Red: in standard solutions, and; Black: compared them with the native peaks of not-spiked urine samples.

**Table S1. Characteristics of the study cohort.**

|                               | Pancreatic ductal<br>adenocarcinoma (PDAC)<br>(n = 28) | Control<br>(n = 33) | p value |
|-------------------------------|--------------------------------------------------------|---------------------|---------|
| <b>Demographics</b>           |                                                        |                     |         |
| Age (Mean ± SD)               | 67.9 ± 12.2                                            | 52.7 ± 17.9         | 0.571   |
| Gender (M : F)                | 18 : 10                                                | 18 : 15             | 0.441   |
| <b>Primary tumour (T)</b>     |                                                        |                     |         |
| T1                            | 0 (0%)                                                 | -                   |         |
| T2                            | 0 (0%)                                                 | -                   |         |
| T3                            | 12 (43%)                                               | -                   |         |
| T4                            | 12 (43%)                                               | -                   |         |
| Unknown                       | 4 (14%)                                                | -                   |         |
| <b>Reginal lymph node (N)</b> |                                                        |                     |         |
| N0                            | 5 (18%)                                                | -                   |         |
| N1                            | 16 (57%)                                               | -                   |         |
| N2                            | 3 (11%)                                                | -                   |         |
| Unknown                       | 4 (14%)                                                | -                   |         |
| <b>Distant metastasis (M)</b> |                                                        |                     |         |
| M0                            | 9 (32%)                                                | -                   |         |
| M1                            | 9 (32%)                                                | -                   |         |
| Mx                            | 6 (22%)                                                | -                   |         |
| Unknown                       | 4 (14%)                                                | -                   |         |
| Chemotherapy                  | 23 (82%)                                               | 0 (0%)              | 1       |
| Antibiotics                   | 4 (14%)                                                | 3 (9%)              | 0.526   |
| Diabetes                      | 13 (46%)                                               | 3 (9%)              | < 0.001 |

Comparisons were performed with Pearson Chi-Squared test.

**Table S2. List of VOCs from urine of healthy individuals identified by the optimal polar GC-TOF assay.**

| No. | RT    | Top Ions      | RI   | Compound Name                                                 | CAS No./<br>NIST No. |
|-----|-------|---------------|------|---------------------------------------------------------------|----------------------|
| 1   | 1.451 | 41, 72, 39    | 459  | 1-Octanamine                                                  | 111-86-4             |
| 2   | 1.460 | 43, 58, 32    | 462  | Acetone                                                       | 67-64-1              |
| 3   | 1.495 | 74, 59, 43    | 473  | Urea, N-ethyl-N-nitroso-                                      | 759-73-9             |
| 4   | 1.635 | 82, 53, 81    | 518  | Furan, 3-methyl-                                              | 930-27-8             |
| 5   | 2.107 | 79, 77, 94    | 667  | 1,4-Cyclohexadiene, 1-methyl-                                 | 4313-57-9            |
| 6   | 2.126 | 96, 95, 43    | 673  | Furan, 2,5-dimethyl-                                          | 625-86-5             |
| 7   | 2.163 | 85, 41, 55    | 685  | 1-Methoxy-3-methyl-2-butene                                   | 22093-99-8           |
| 8   | 2.243 | 96, 67, 95    | 710  | 2,4-Dimethylfuran                                             | 3710-43-8            |
| 9   | 2.271 | 91, 107, 79   | 719  | Bicyclo[3.1.1]hept-2-en-6-one, 2,7,7-trimethyl-               | 473-06-3             |
| 10  | 2.352 | 86, 32, 43    | 745  | 2-Pentanone                                                   | 107-87-9             |
| 11  | 2.577 | 71, 43, 114   | 816  | Hexane, 3,3,4,4-tetramethyl-                                  | 5171-84-6            |
| 12  | 2.942 | 95, 32, 110   | 917  | 2-Furoic acid, pentafluorophenyl ester                        | 355170               |
| 13  | 3.249 | 43, 57, 71    | 968  | 3-Hexanone                                                    | 589-38-8             |
| 14  | 3.262 | 71, 43, 41    | 971  | 3-Buten-2-ol, 2-methyl-                                       | 115-18-4             |
| 15  | 3.299 | 43, 109, 110  | 977  | Furan, 2,3,5-trimethyl-                                       | 10504-04-8           |
| 16  | 3.488 | 94, 45, 79    | 1005 | Disulfide, dimethyl                                           | 624-92-0             |
| 17  | 3.605 | 57, 41, 39    | 1015 | di-tert-Butyl dicarbonate                                     | 24424-99-5           |
| 18  | 3.737 | 44, 41, 56    | 1027 | Hexanal                                                       | 66-25-1              |
| 19  | 4.102 | 43, 41, 42    | 1059 | 1-Propanol, 2-methyl-                                         | 78-83-1              |
| 20  | 4.107 | 109, 41, 57   | 1060 | 2-Cyclopenten-1-one, 3,5,5-trimethyl-                         | 24156-95-4           |
| 21  | 4.130 | 124, 109, 95  | 1062 | 1-Propanone, 1-(2-furanyl)-                                   | 3194-15-8            |
| 22  | 4.236 | 68, 71, 139   | 1071 | 2H-Pyran, 2-ethenyltetrahydro-2,6,6-trimethyl-                | 7392-19-0            |
| 23  | 4.362 | 59, 45, 87    | 1083 | 2-Pentanol, 2-methyl-                                         | 590-36-3             |
| 24  | 4.555 | 43, 71, 41    | 1100 | 3-Hexanone, 2-methyl-                                         | 7379-12-6            |
| 25  | 4.595 | 43, 57, 55    | 1102 | 1-Pentanol, 2,2-dimethyl-                                     | 2370-12-9            |
| 26  | 4.721 | 45, 207, 103  | 1109 | Aminocaproic acid                                             | 60-32-2              |
| 27  | 4.907 | 121, 93, 79   | 1120 | 2-Carene                                                      | 554-61-0             |
| 28  | 5.196 | 57, 41, 56    | 1136 | Butane, 1,1,1-[methylidynetris(oxy)]tris-                     | 588-43-2             |
| 29  | 5.623 | 91, 111, 106  | 1160 | 7-Oxabicyclo[2.2.1]heptane, 1-methyl-4-(1-methylethyl)-       | 470-67-7             |
| 30  | 5.833 | 58, 43, 71    | 1172 | 2-Heptanone                                                   | 110-43-0             |
| 31  | 5.878 | 109, 79, 94   | 1174 | 2,3-Dehydro-1,8-cineole                                       | 92760-25-3           |
| 32  | 6.205 | 93, 77, 71    | 1193 | $\beta$ -Phellandrene                                         | 555-10-2             |
| 33  | 6.215 | 71, 43, 41    | 1193 | 2-(1-Adamantyl)piperidine                                     | 195243-62-0          |
| 34  | 6.348 | 69, 42, 98    | 1201 | (R)-(+)-3-Methylcyclopentanone                                | 6672-30-6            |
| 35  | 6.389 | 138, 95, 98   | 1202 | Cyclohexene, 1-methyl-3-(1-methylethyl)-                      | 13828-31-4           |
| 36  | 6.469 | 43, 58, 91    | 1206 | 2-Hexanone, 4-methyl-                                         | 105-42-0             |
| 37  | 6.780 | 55, 42, 41    | 1220 | 1-Butanol, 3-methyl-                                          | 123-51-3             |
| 38  | 6.894 | 109, 138, 79  | 1225 | 1-Propanone, 1-(5-methyl-2-furanyl)-                          | 10599-69-6           |
| 39  | 7.073 | 81, 82, 53    | 1233 | Furan, 2-pentyl-                                              | 3777-69-3            |
| 40  | 7.127 | 111, 138, 126 | 1235 | Pyrimido[5,4-d]pyrimidine, 2,4,6,8-tetrakis(m-chloroanilino)- | 18710-95-7           |
| 41  | 7.244 | 93, 91, 119   | 1241 | $\gamma$ -Terpinene                                           | 99-85-4              |

|    |        |               |      |                                                                              |             |
|----|--------|---------------|------|------------------------------------------------------------------------------|-------------|
| 42 | 7.260  | 91, 39, 134   | 1241 | p-Mentha-1,5,8-triene                                                        | 21195-59-5  |
| 43 | 7.293  | 81, 53, 112   | 1243 | Furan, 2-(methoxymethyl)-                                                    | 13679-46-4  |
| 44 | 7.453  | 122, 43, 107  | 1250 | Phenol, 2,4-dimethyl-                                                        | 105-67-9    |
| 45 | 7.704  | 57, 43, 72    | 1261 | 3-Octanone                                                                   | 106-68-3    |
| 46 | 7.794  | 68, 56, 31    | 1265 | Acetic acid, 2-propylphenyl ester                                            | 35922-83-9  |
| 47 | 7.894  | 119, 91, 134  | 1270 | p-Cymene                                                                     | 99-87-6     |
| 48 | 7.900  | 42, 55, 41    | 1270 | 1-Pentanol                                                                   | 71-41-0     |
| 49 | 8.087  | 59, 56, 60    | 1278 | Propylamine                                                                  | 107-10-8    |
| 50 | 8.209  | 93, 121, 136  | 1284 | Cyclohexene, 1-methyl-4-(1-methylethylidene)-                                | 586-62-9    |
| 51 | 8.561  | 43, 58, 122   | 1300 | 2-Octanone                                                                   | 111-13-7    |
| 52 | 9.165  | 43, 57, 41    | 1322 | Methyl isobutyrate                                                           | 547-63-7    |
| 53 | 9.473  | 83, 55, 56    | 1334 | 3-Ethylcyclopentanone                                                        | 10264-55-8  |
| 54 | 10.139 | 59, 128, 43   | 1359 | 1,7-Octanediol, 3,7-dimethyl-                                                | 107-74-4    |
| 55 | 10.647 | 39, 99, 41    | 1378 | Allyl Isothiocyanate                                                         | 57-06-7     |
| 56 | 11.279 | 137, 57, 67   | 1402 | cis-4a-Methyl-decahydronaphthalene                                           | 2547-26-4   |
| 57 | 11.434 | 92, 91, 43    | 1407 | Benzyl isopentyl ether                                                       | 122-73-6    |
| 58 | 11.571 | 82, 138, 54   | 1412 | Isophorone                                                                   | 78-59-1     |
| 59 | 12.271 | 43, 113, 59   | 1436 | 2-Pentenoic acid, 4-oxo-, methyl ester, (Z)-                                 | 19522-27-1  |
| 60 | 12.703 | 117, 132, 91  | 1451 | Benzene, 1-methyl-4-(1-methylethenyl)-                                       | 1195-32-0   |
| 61 | 12.769 | 159, 175, 174 | 1454 | p-(1-Propenyl)-toluene                                                       | 429549      |
| 62 | 13.274 | 59, 43, 94    | 1471 | 2-Furanmethanol, 5-ethenyltetrahydro- $\alpha,\alpha,5$ -trimethyl-, cis-    | 5989-33-3   |
| 63 | 13.299 | 112, 69, 41   | 1472 | Cyclohexanone, 5-methyl-2-(1-methylethyl)-, cis-                             | 491-07-6    |
| 64 | 13.506 | 73, 69, 55    | 1479 | 3-Octanol, 3,6-dimethyl-                                                     | 151-19-9    |
| 65 | 13.754 | 96, 95, 159   | 1488 | Furfural                                                                     | 98-01-1     |
| 66 | 13.830 | 68, 67, 83    | 1491 | 2H-Pyran, 3,6-dihydro-4-methyl-2-(2-methyl-1-propenyl)-                      | 1786-08-9   |
| 67 | 13.912 | 119, 134, 146 | 1494 | Benzene, 1,2,4,5-tetramethyl-                                                | 95-93-2     |
| 68 | 14.074 | 112, 41, 69   | 1499 | Cyclohexanone, 5-methyl-2-(1-methylethyl)-, (2R-cis)-                        | 1196-31-2   |
| 69 | 14.076 | 59, 94, 67    | 1499 | 1-Butanol, 3-methoxy-                                                        | 2517-43-3   |
| 70 | 14.362 | 138, 107, 149 | 1510 | (3R,9aR)-3-Butyloctahydro-1H-pyrrolo[1,2-a]azepine                           | 929631-67-4 |
| 71 | 14.534 | 59, 55, 41    | 1516 | 7-Octen-2-ol, 2,6-dimethyl-                                                  | 18479-58-8  |
| 72 | 14.914 | 179, 119, 109 | 1530 | Benzoic acid, 2-dimethylamino-5-phenylsulfonylamino-                         | 263392      |
| 73 | 15.001 | 57, 31, 83    | 1533 | 1-Penten-3-ol                                                                | 616-25-1    |
| 74 | 15.452 | 85, 186, 184  | 1550 | 2(3H)-Furanone, 5-hexyldihydro-                                              | 706-14-9    |
| 75 | 15.527 | 138, 139, 123 | 1552 | (Z)-7-((5R,8R,8aS)-8-Methyloctahydroindolizin-5-yl)hept-3-en-2-ol            | 367215      |
| 76 | 15.695 | 41, 43, 55    | 1558 | 2-Nonenal, (E)-                                                              | 18829-56-6  |
| 77 | 15.804 | 159, 59, 57   | 1562 | Naphthalene, 1,2,3,4-tetrahydro-1,1,6-trimethyl-                             | 475-03-6    |
| 78 | 15.973 | 43, 95, 138   | 1569 | 4-Acetyl-1-methylcyclohexene                                                 | 6090-09-01  |
| 79 | 16.034 | 135, 109, 79  | 1571 | N-Benzylformamide                                                            | 6343-54-0   |
| 80 | 16.667 | 41, 93, 71    | 1594 | Linalool                                                                     | 78-70-6     |
| 81 | 16.790 | 110, 109, 87  | 1598 | Benzenethiol                                                                 | 108-98-5    |
| 82 | 17.067 | 43, 99, 55    | 1609 | 3-Pentenoic acid, 4-methyl-                                                  | 504-85-8    |
| 83 | 17.446 | 67, 95, 68    | 1622 | Cyclohexene, 1-methyl-4-(1-methylethyl)-, (R)-                               | 1195-31-9   |
| 84 | 17.623 | 177, 133, 178 | 1629 | 1-naphthalenesulfonamide, 5-(acetyloxy)-N-[4-(diethylamino)-2-methylphenyl]- | 399203      |



|     |        |               |      |                                                                                      |            |
|-----|--------|---------------|------|--------------------------------------------------------------------------------------|------------|
| 85  | 17.765 | 95, 81, 138   | 1634 | Bicyclo[2.2.1]heptane, 1,7,7-trimethyl-                                              | 464-15-3   |
| 86  | 17.896 | 105, 77, 51   | 1639 | Benzoic acid, methyl ester                                                           | 93-58-3    |
| 87  | 18.348 | 71, 82, 67    | 1655 | 1,5,7-Octatrien-3-ol, 3,7-dimethyl-                                                  | 29957-43-5 |
| 88  | 18.514 | 91, 119, 120  | 1661 | Benzaldehyde, 4-methyl-                                                              | 104-87-0   |
| 89  | 18.948 | 43, 55, 67    | 1677 | 1,5-Pentanediol, 3-methyl-                                                           | 4457-71-0  |
| 90  | 18.974 | 81, 95, 71    | 1678 | Cyclohexanol, 5-methyl-2-(1-methylethyl)-, (1 $\alpha$ ,2 $\beta$ ,5 $\alpha$ )-(±)- | 15356-70-4 |
| 91  | 19.195 | 111, 55, 67   | 1686 | 2(3H)-Furanone, 5-ethenyldihydro-5-methyl-                                           | 1073-11-6  |
| 92  | 19.491 | 42, 45, 43    | 1697 | Mercaptamine                                                                         | 60-23-1    |
| 93  | 19.515 | 91, 134, 119  | 1698 | Ethanone, 1-(4-methylphenyl)-                                                        | 122-00-9   |
| 94  | 20.010 | 146, 145, 117 | 1716 | Benzofuran, 4,7-dimethyl-                                                            | 28715-26-6 |
| 95  | 20.471 | 59, 93, 68    | 1733 | $\alpha$ -Terpineol                                                                  | 98-55-5    |
| 96  | 20.604 | 110, 82, 109  | 1738 | 2-Cyclohexen-1-one, 3-methyl-6-(1-methylethyl)-                                      | 89-81-6    |
| 97  | 20.853 | 82, 54, 39    | 1748 | Carvone                                                                              | 99-49-0    |
| 98  | 20.943 | 157, 142, 141 | 1751 | Naphthalene, 1,2-dihydro-1,5,8-trimethyl-                                            | 4506-36-9  |
| 99  | 20.986 | 173, 188, 174 | 1753 | Benzimidazole, 5-tert-butyl-2-methyl-                                                | 5805-62-9  |
| 100 | 21.398 | 97, 55, 69    | 1768 | 2-Thiopheneacetic acid, 1-cyclopentylethyl ester                                     | 278960     |
| 101 | 21.742 | 111, 68, 112  | 1781 | 1-[(2-Thienylcarbonyl)oxy]-2,5-pyrrolidinedione                                      | 83039-60-5 |
| 102 | 21.820 | 150, 91, 84   | 1784 | Benzeneacetic acid, methyl ester                                                     | 101-41-7   |
| 103 | 22.070 | 133, 105, 148 | 1793 | Ethanone, 1-(2,5-dimethylphenyl)-                                                    | 2142-73-6  |
| 104 | 22.375 | 42, 70, 43    | 1805 | 2H-Pyran-2-one, tetrahydro-6-methyl-                                                 | 823-22-3   |
| 105 | 22.411 | 129, 128, 144 | 1806 | Naphthalene, 1,2-dihydro-4-methyl-                                                   | 4373-13-1  |
| 106 | 22.704 | 119, 91, 105  | 1818 | (2R,8R,8aS)-8,8a-Dimethyl-2-(prop-1-en-2-yl)-1,2,3,7,8,8a-hexahydronaphthalene       | 5090-61-9  |
| 107 | 22.962 | 173, 174, 188 | 1828 | 1H-Indene, 2,3-dihydro-1,1,2,3,3-pentamethyl-                                        | 1203-17-4  |
| 108 | 23.234 | 69, 121, 41   | 1839 | 2-Buten-1-one, 1-(2,6,6-trimethyl-1,3-cyclohexadien-1-yl)-, (E)-                     | 23726-93-4 |
| 109 | 24.109 | 91, 109, 119  | 1874 | 2-Cyclohexen-1-ol, 2-methyl-5-(1-methylethenyl)-, (1S-trans)-                        | 2102-58-1  |
| 110 | 25.334 | 157, 142, 141 | 1923 | 4-Isopropyl-6-methyl-1-methylene-1,2,3,4-tetrahydronaphthalene                       | 50277-34-4 |
| 111 | 25.412 | 145, 160, 118 | 1926 | Benzene, 4-(2-butenyl)-1,2-dimethyl-, (E)-                                           | 54340-86-2 |
| 112 | 26.904 | 122, 123, 206 | 1986 | Lauric acid, 3,5-dimethylphenyl ester                                                | 357926     |
| 113 | 27.741 | 43, 175, 157  | 2021 | 4-(2,6,6-Trimethylcyclohexa-1,3-dienyl)but-3-en-2-one                                | 1203-08-3  |
| 114 | 28.449 | 94, 66, 65    | 2052 | Phenol                                                                               | 108-95-2   |
| 115 | 28.860 | 185, 200, 157 | 2070 | $\alpha$ -Corocalene                                                                 | 20129-39-9 |
| 116 | 28.892 | 164, 149, 77  | 2072 | Benzene, 4-ethenyl-1,2-dimethoxy-                                                    | 6380-23-0  |
| 117 | 29.019 | 119, 105, 134 | 2077 | Spiro[3.5]nona-5,7-dien-1-one, 5,9,9-trimethyl-                                      | 91531-36-1 |
| 118 | 30.205 | 107, 108, 77  | 2129 | p-Cresol                                                                             | 106-44-5   |
| 119 | 30.811 | 184, 169, 128 | 2155 | Chamazulene                                                                          | 529-05-5   |
| 120 | 31.093 | 155, 41, 55   | 2168 | Naphthalene, 2,3,6-trimethyl-                                                        | 829-26-5   |
| 121 | 33.100 | 135, 150, 107 | 2256 | 4-Hydroxy-2-methylacetophenone                                                       | 875-59-2   |

RT: retention time; RI: retention index.

**Table S3. List of VOCs from urine of healthy individuals identified by the optimal non-polar GC-TOF assay.**

| No. | RT     | Top Ions      | RI  | Compound Name                                                                 | CAS No./<br>NIST No. |
|-----|--------|---------------|-----|-------------------------------------------------------------------------------|----------------------|
| 1   | 2.111  | 43, 58, 42    | 175 | Benzaldehyde, 2,4-dinitro-, 2,2-dimethylhydrazone                             | 90535-55-0           |
| 2   | 3.755  | 43, 72, 57    | 311 | 2-Propen-1-ol, 2-methyl-, acetate                                             | 820-71-3             |
| 3   | 4.205  | 69, 74, 131   | 348 | Perfluorooctane                                                               | 307-34-6             |
| 4   | 4.247  | 71, 59, 41    | 351 | 3-Penten-2-ol                                                                 | 1569-50-2            |
| 5   | 4.596  | 55, 84, 83    | 380 | 2-Ethylacrolein                                                               | 922-63-4             |
| 6   | 5.956  | 57, 41, 58    | 493 | Carbonic acid, ethyl 2-propenyl ester                                         | 1469-70-1            |
| 7   | 6.117  | 69, 163, 227  | 506 | Ethyl trifluoromethanesulfonate                                               | 425-75-2             |
| 8   | 7.368  | 96, 67, 95    | 610 | 3,4-dimethylfuran                                                             | 458504               |
| 9   | 7.638  | 94, 65, 66    | 632 | Carbamic acid, butylmethyl-, phenyl ester                                     | 54644-61-0           |
| 10  | 8.082  | 43, 58, 57    | 669 | Methyl Isobutyl Ketone                                                        | 108-10-1             |
| 11  | 8.171  | 84, 55, 39    | 676 | 2-Butenal, 2-methyl-, (E)-                                                    | 497-03-0             |
| 12  | 8.378  | 57, 43, 100   | 693 | 3-Pentanone, 2-methyl-                                                        | 565-69-5             |
| 13  | 8.434  | 43, 57, 41    | 698 | 2-Pentanone, 3-methyl-                                                        | 565-61-7             |
| 14  | 9.253  | 43, 57, 71    | 766 | 3-Hexanone                                                                    | 589-38-8             |
| 15  | 9.356  | 43, 58, 57    | 774 | Pentanal, 2,4-dimethyl-                                                       | 27944-79-2           |
| 16  | 9.408  | 81, 110, 32   | 779 | Furan, 2-propyl-                                                              | 4229-91-8            |
| 17  | 9.470  | 43, 71, 41    | 784 | 3-Pentanone, 2,4-dimethyl-                                                    | 565-80-0             |
| 18  | 9.634  | 95, 110, 96   | 797 | 2-Furancarboxylic acid, cyclobutyl ester                                      | 282759               |
| 19  | 9.664  | 44, 56, 41    | 800 | Hexanal                                                                       | 66-25-1              |
| 20  | 10.281 | 81, 53, 112   | 827 | Furan, 2-(methoxymethyl)-                                                     | 13679-46-4           |
| 21  | 10.369 | 108, 107, 65  | 831 | Carbamic acid, p-tolyl ester                                                  | 1850-13-1            |
| 22  | 10.469 | 57, 85, 41    | 836 | 3-Hexanone, 5-methyl-                                                         | 623-56-3             |
| 23  | 10.542 | 43, 71, 86    | 839 | 2-Pentanone, 3-ethyl-                                                         | 6137-03-7            |
| 24  | 10.594 | 57, 41, 114   | 841 | Isobutyl ether                                                                | 628-55-7             |
| 25  | 10.706 | 43, 72, 57    | 846 | 2-Hexanone, 3-methyl-                                                         | 2550-21-2            |
| 26  | 10.753 | 107, 91, 122  | 848 | 1,3-Cyclopentadiene, 5,5-dimethyl-1-ethyl-                                    | 162257               |
| 27  | 10.840 | 98, 42, 69    | 852 | 2-Furanmethanol                                                               | 98-00-0              |
| 28  | 10.887 | 109, 124, 110 | 854 | Ethyl 2-(2-chloroacetamido)-3,3,3-trifluoro-2-(2-fluorobenzylamino)propionate | 339352-72-6          |
| 29  | 10.908 | 41, 55, 69    | 855 | 2-Hexenal                                                                     | 505-57-7             |
| 30  | 10.958 | 58, 43, 82    | 857 | 2H-Pyran, 3,4-dihydro-2-methoxy-                                              | 4454-05-1            |
| 31  | 11.100 | 59, 45, 72    | 864 | Ethanedioic acid, dimethyl ester                                              | 553-90-2             |
| 32  | 11.302 | 43, 71, 41    | 873 | 4-Heptanone                                                                   | 123-19-3             |
| 33  | 11.592 | 57, 85, 95    | 886 | 3-Heptanone                                                                   | 106-35-4             |
| 34  | 11.639 | 109, 124, 110 | 888 | 1-(3-Methyl-2H-pyrazol-4-yl)ethanone                                          | 436162               |
| 35  | 11.669 | 43, 58, 71    | 889 | 2-Heptanone                                                                   | 110-43-0             |
| 36  | 11.782 | 59, 56, 83    | 894 | N-Chloroacetyl-dl-erythro-O-methylthreonine                                   | 214481               |
| 37  | 11.838 | 104, 103, 78  | 896 | Styrene                                                                       | 100-42-5             |
| 38  | 12.003 | 109, 124, 110 | 904 | 3-Fluoro-o-xylene                                                             | 443-82-3             |
| 39  | 12.080 | 79, 94, 48    | 908 | Dimethyl sulfone                                                              | 67-71-0              |
| 40  | 12.106 | 111, 112, 97  | 910 | Thiophene, 3,4-dimethyl-                                                      | 632-15-5             |

|    |        |               |      |                                                                                       |             |
|----|--------|---------------|------|---------------------------------------------------------------------------------------|-------------|
| 41 | 12.188 | 109, 124, 79  | 914  | 2-Cyclopenten-1-one, 3,5,5-trimethyl-                                                 | 24156-95-4  |
| 42 | 12.238 | 59, 70, 97    | 916  | Butane, 2-methoxy-3-methyl-                                                           | 62016-49-3  |
| 43 | 12.439 | 95, 126, 94   | 927  | Methyl 2-furoate                                                                      | 611-13-2    |
| 44 | 12.508 | 105, 120, 106 | 930  | Benzene, 1-ethyl-4-methyl-                                                            | 622-96-8    |
| 45 | 12.529 | 59, 43, 41    | 931  | 1,7-Octanediol, 3,7-dimethyl-                                                         | 107-74-4    |
| 46 | 12.772 | 43, 72, 57    | 944  | 2-Hexanone, 3,4-dimethyl-                                                             | 19550-10-8  |
| 47 | 13.088 | 93, 79, 121   | 960  | Bicyclo[2.2.1]heptane, 7,7-dimethyl-2-methylene-                                      | 471-84-1    |
| 48 | 13.167 | 110, 109, 53  | 964  | 2-Furancarboxaldehyde, 5-methyl-                                                      | 620-02-0    |
| 49 | 13.182 | 91, 92, 119   | 964  | Bicyclo[3.1.0]hex-2-ene, 4-methylene-1-(1-methylethyl)-                               | 36262-09-6  |
| 50 | 13.201 | 83, 55, 56    | 965  | 3-Ethylcyclopentanone                                                                 | 10264-55-8  |
| 51 | 13.435 | 139, 68, 71   | 977  | 2H-Pyran, 2-ethenyltetrahydro-2,6,6-trimethyl-                                        | 7392-19-0   |
| 52 | 13.512 | 119, 59, 91   | 981  | 1,3,5-Cycloheptatriene, 3,7,7-trimethyl-                                              | 3479-89-8   |
| 53 | 13.560 | 99, 43, 55    | 984  | 3-Pentenoic acid, 4-methyl-                                                           | 504-85-8    |
| 54 | 13.586 | 95, 47, 48    | 985  | Cyclohexene, 1-methyl-3-(1-methylethyl)-                                              | 13828-31-4  |
| 55 | 13.729 | 81, 82, 138   | 992  | Furan, 2-pentyl-                                                                      | 3777-69-3   |
| 56 | 13.754 | 107, 91, 122  | 994  | 1-Propanol, 3-(phenylmethoxy)-                                                        | 4799-68-2   |
| 57 | 13.964 | 121, 140, 96  | 1005 | Propanedinitrile, [3-(4-methoxyphenyl)-1-methylpropylidene]-                          | 69244-84-4  |
| 58 | 13.980 | 121, 136, 93  | 1006 | 1,3-Cyclopentadiene, 1,2,3,4,5-pentamethyl-                                           | 4045-44-7   |
| 59 | 14.037 | 111, 112, 45  | 1009 | 2-Thiophenecarboxaldehyde                                                             | 98-03-3     |
| 60 | 14.115 | 91, 119, 134  | 1013 | 6,7-Dimethyl-3,5,8,8a-tetrahydro-1H-2-benzopyran                                      | 110028-10-9 |
| 61 | 14.149 | 93, 91, 77    | 1015 | $\alpha$ -Phellandrene                                                                | 99-83-2     |
| 62 | 14.182 | 132, 117, 115 | 1017 | Benzene, 1-methyl-2-(2-propenyl)-                                                     | 1587-04-8   |
| 63 | 14.285 | 43, 111, 71   | 1023 | 7-Oxabicyclo[2.2.1]heptane, 1-methyl-4-(1-methylethyl)-                               | 470-67-7    |
| 64 | 14.337 | 121, 93, 91   | 1026 | 1,3-Cyclohexadiene, 1-methyl-4-(1-methylethyl)-                                       | 99-86-5     |
| 65 | 14.354 | 119, 134, 120 | 1027 | p-Cymene                                                                              | 99-87-6     |
| 66 | 14.469 | 119, 134, 91  | 1033 | Benzene, 1-methyl-3-(1-methylethyl)-                                                  | 535-77-3    |
| 67 | 14.493 | 119, 120, 32  | 1035 | 3-Pyridinecarbonitrile, 1,4-dihydro-1-methyl-                                         | 19424-15-8  |
| 68 | 14.569 | 68, 67, 93    | 1039 | Limonene                                                                              | 138-86-3    |
| 69 | 14.637 | 93, 91, 77    | 1043 | $\beta$ -Phellandrene                                                                 | 555-10-2    |
| 70 | 14.650 | 111, 55, 67   | 1044 | 4-Methyl-4-vinylbutyrolactone                                                         | 427992      |
| 71 | 14.664 | 119, 134, 120 | 1044 | Benzene, 1-ethyl-3,5-dimethyl-                                                        | 934-74-7    |
| 72 | 15.058 | 93, 91, 77    | 1067 | $\gamma$ -Terpinene                                                                   | 99-85-4     |
| 73 | 15.277 | 59, 43, 94    | 1079 | 2-Furanmethanol, 5-ethenyltetrahydro- $\alpha,\alpha,5$ -trimethyl-, cis-             | 5989-33-3   |
| 74 | 15.420 | 91, 92, 43    | 1087 | Undecane, 3-phenethyl-1-phenyl-                                                       | 7225-70-9   |
| 75 | 15.449 | 132, 117, 115 | 1089 | Benzene, 1-ethenyl-3,5-dimethyl-                                                      | 5379-20-4   |
| 76 | 15.475 | 58, 32, 71    | 1090 | Benzo[c]thiophene-1-carboxylic acid, 4,5,6,7-tetrahydro-, (2-dimethylaminoethyl)amide | 304411      |
| 77 | 15.481 | 58, 59, 71    | 1091 | 1-(2-Dimethylaminoethyl)-3,3-dimethyldiaziridine                                      | 54731-08-7  |
| 78 | 15.551 | 59, 94, 68    | 1095 | trans-Linalool oxide (furanoid)                                                       | 34995-77-2  |
| 79 | 15.560 | 121, 93, 136  | 1095 | Cyclohexene, 1-methyl-4-(1-methylethylidene)-                                         | 586-62-9    |
| 80 | 15.624 | 132, 117, 115 | 1099 | Benzene, 1-methyl-4-(1-methylethenyl)-                                                | 1195-32-0   |
| 81 | 15.861 | 135, 71, 44   | 1113 | 3-Adamantan-1-yl-heptan-4-one                                                         | 296505      |
| 82 | 16.031 | 119, 134, 91  | 1124 | p-Mentha-1,5,8-triene                                                                 | 21195-59-5  |
| 83 | 16.054 | 109, 81, 123  | 1125 | 1-Allyl-cyclopropanecarboxylic acid, 2,6-di-t-butyl-4-methyl-phenyl ester             | 108546-69-6 |

|     |        |               |      |                                                          |             |
|-----|--------|---------------|------|----------------------------------------------------------|-------------|
| 84  | 16.124 | 108, 93, 113  | 1130 | 1,7,7-Trimethylbicyclo[2.2.1]hept-5-en-2-one             | 22516-10-5  |
| 85  | 16.207 | 130, 201, 213 | 1135 | D-Tryptophan                                             | 153-94-6    |
| 86  | 16.264 | 91, 119, 93   | 1138 | cis-Pinen-3-ol                                           | 292852      |
| 87  | 16.286 | 108, 93, 95   | 1140 | $\alpha$ -Campholenal                                    | 4501-58-0   |
| 88  | 16.327 | 95, 138, 123  | 1142 | 4-Methoxy-o-phenylenediamine                             | 102-51-2    |
| 89  | 16.459 | 91, 119, 134  | 1150 | 1,3,8-p-Menthatriene                                     | 18368-95-1  |
| 90  | 16.782 | 56, 84, 42    | 1170 | Propane, 1-isocyanato-                                   | 110-78-1    |
| 91  | 16.858 | 59, 339, 94   | 1175 | Phenol, 4,4-butyldenebis[2-(1,1-dimethylethyl)-5-methyl- | 85-60-9     |
| 92  | 16.920 | 108, 150, 149 | 1179 | Benzofuran, 4,5,6,7-tetrahydro-3,6-dimethyl-             | 494-90-6    |
| 93  | 17.109 | 95, 81, 71    | 1190 | dl-Menthol                                               | 89-78-1     |
| 94  | 17.276 | 119, 91, 43   | 1200 | Ethanone, 1-(4-methylphenyl)-                            | 122-00-9    |
| 95  | 17.299 | 137, 69, 107  | 1202 | 3,7-Dimethyl-2,3,3a,4,5,6-hexahydro-1-benzofuran #       | 99606       |
| 96  | 17.395 | 59, 93, 68    | 1208 | $\alpha$ -Terpineol                                      | 98-55-5     |
| 97  | 17.454 | 73, 154, 99   | 1212 | 1,3-Dioxolane, 2-(1,1-dimethylethyl)-                    | 2568-29-8   |
| 98  | 17.492 | 79, 107, 77   | 1215 | (1R)-(-)-Myrtenal                                        | 18486-69-6  |
| 99  | 17.755 | 159, 174, 160 | 1232 | Naphthalene, 1,2,3,4-tetrahydro-1,1,6-trimethyl-         | 475-03-6    |
| 100 | 17.799 | 146, 145, 117 | 1235 | Benzofuran, 4,7-dimethyl-                                | 28715-26-6  |
| 101 | 17.874 | 73, 122, 32   | 1240 | 1,3-Dioxolane, 2-(1-phenylethyl)-                        | 4362-22-5   |
| 102 | 17.931 | 161, 176, 162 | 1244 | Ethanone, 1-[4-(1,1-dimethylethyl)phenyl]-               | 943-27-1    |
| 103 | 18.036 | 137, 69, 109  | 1251 | 3,6-Dimethyl-2,3,3a,4,5,7a-hexahydrobenzofuran           | 70786-44-6  |
| 104 | 18.164 | 82, 54, 108   | 1259 | (-)-Carvone                                              | 6485-40-1   |
| 105 | 18.354 | 82, 110, 95   | 1272 | 2-Cyclohexen-1-one, 3-methyl-6-(1-methylethyl)-          | 89-81-6     |
| 106 | 18.653 | 135, 150, 159 | 1292 | Thymol                                                   | 89-83-8     |
| 107 | 18.667 | 148, 147, 139 | 1293 | 3-Methylbenzothiophene                                   | 1455-18-1   |
| 108 | 18.730 | 161, 176, 162 | 1297 | Benzo[b]thiophene, 7-ethyl-2-methyl-                     | 16587-44-3  |
| 109 | 18.760 | 109, 81, 41   | 1299 | 1-Cyclohexene-1-carboxaldehyde, 4-(1-methylethyl)-       | 21391-98-0  |
| 110 | 18.837 | 189, 204, 205 | 1304 | 4-tert-Butyl-2,6-dimethylacetophenone                    | 2040-10-0   |
| 111 | 18.909 | 117, 90, 89   | 1309 | Indole                                                   | 120-72-9    |
| 112 | 18.968 | 91, 68, 79    | 1313 | p-Mentha-1,8-dien-7-ol                                   | 536-59-4    |
| 113 | 18.988 | 129, 144, 128 | 1315 | 1H-Indene, 4,7-dimethyl-                                 | 6974-97-6   |
| 114 | 19.020 | 121, 93, 152  | 1317 | Benzoic acid, 4-hydroxy-, hydrazide                      | 5351-23-5   |
| 115 | 19.092 | 150, 135, 71  | 1322 | 5-Isopropyl-2-methylphenyl pentanoate                    | 367117      |
| 116 | 19.108 | 138, 162, 159 | 1323 | 3-Methoxy-5-methylphenol                                 | 3209-13-0   |
| 117 | 19.121 | 138, 82, 96   | 1324 | 1-Oxaspiro[4.5]dec-6-ene, 2,6,10,10-tetramethyl-         | 36431-72-8  |
| 118 | 19.183 | 162, 147, 171 | 1329 | Benzene, 1-methyl-4-[(methylthio)ethynyl]-               | 17293-64-0  |
| 119 | 19.341 | 138, 139, 125 | 1340 | (5R,8R)-8-Methyl-5-pentyl-octahydroindolizine            | 117959-79-2 |
| 120 | 19.352 | 79, 91, 43    | 1341 | 1,4-Cyclohexadiene-1-methanol, 4-(1-methylethyl)-        | 22539-72-6  |
| 121 | 19.485 | 145, 160, 146 | 1350 | Naphthalene, 1,2,3,4-tetrahydro-1,8-dimethyl-            | 25419-33-4  |
| 122 | 19.769 | 173, 85, 188  | 1370 | Benzimidazole, 5-tert-butyl-2-methyl-                    | 5805-62-9   |
| 123 | 19.798 | 91, 121, 79   | 1372 | Hexane, 1-chloro-5-methyl-                               | 33240-56-1  |
| 124 | 19.893 | 134, 158, 162 | 1379 | Propionic acid, 3-amino-3-(4-ethylphenyl)-, methyl ester | 317077      |
| 125 | 19.902 | 157, 142, 172 | 1379 | Naphthalene, 1,2-dihydro-1,5,8-trimethyl-                | 4506-36-9   |
| 126 | 19.925 | 159, 119, 131 | 1381 | 8-Quinololinol, 4-methyl-                                | 3846-73-9   |

|     |        |               |      |                                                                                                                               |             |
|-----|--------|---------------|------|-------------------------------------------------------------------------------------------------------------------------------|-------------|
| 127 | 20.035 | 133, 132, 117 | 1389 | 4H-1,2,4-Triazol-4-amine, 3-(2,4-dichlorophenyl)-5-(2,4,6-trimethylbenzylthio)-                                               | 271709      |
| 128 | 20.120 | 69, 121, 41   | 1395 | 2-Buten-1-one, 1-(2,6,6-trimethyl-1,3-cyclohexadien-1-yl)-, (E)-                                                              | 23726-93-4  |
| 129 | 20.402 | 83, 55, 82    | 1416 | Cyclohexane, octyl-                                                                                                           | 1795-15-9   |
| 130 | 20.408 | 81, 67, 68    | 1416 | Bicyclo[2.2.2]octane, 2-methyl-                                                                                               | 766-53-0    |
| 131 | 20.564 | 185, 200, 157 | 1428 | Ethanone, 1-(5-methyl-1-phenyl-1H-pyrazol-4-yl)-                                                                              | 6123-63-3   |
| 132 | 20.636 | 191, 121, 149 | 1433 | Terephthalic acid, 4-isopropylphenyl propyl ester                                                                             | 323632      |
| 133 | 20.900 | 119, 93, 105  | 1453 | 1H-3a,7-Methanoazulene, 2,3,4,7,8,8a-hexahydro-3,6,8,8-tetramethyl-, [3R-(3 $\alpha$ ,3 $\beta$ ,7 $\beta$ ,8 $\alpha$ )]-    | 469-61-4    |
| 134 | 20.948 | 156, 141, 155 | 1457 | Naphthalene, 1,6-dimethyl-                                                                                                    | 575-43-9    |
| 135 | 21.108 | 159, 161, 160 | 1469 | 2,5-Cyclohexadiene-1,4-dione, 2,6-bis(1,1-dimethylethyl)-                                                                     | 719-22-2    |
| 136 | 21.118 | 191, 145, 187 | 1470 | 2-Pyrrolidinemethanol, 1-(4-nitrophenyl)-                                                                                     | 105173-13-5 |
| 137 | 21.130 | 179, 191, 32  | 1470 | Undecane, 1-(9,10-dihydroanthracen-9-yl)-11-(anthracen-9-yl)-                                                                 | 156039      |
| 138 | 21.320 | 159, 145, 160 | 1485 | 2,5-Dimethoxybenzenesulfonyl chloride                                                                                         | 1483-28-9   |
| 139 | 21.510 | 161, 204, 189 | 1499 | Naphthalene, 1,2,3,5,6,7,8,8a-octahydro-1,8a-dimethyl-7-(1-methylethenyl)-, [1R-(1 $\alpha$ ,7 $\beta$ ,8 $\alpha$ )]-        | 4630-07-3   |
| 140 | 21.570 | 94, 204, 161  | 1504 | L-Alanine, N-[N-[N-(3-pyridinylmethylene)-L-valyl]-L-isoleucyl]-, ethyl ester                                                 | 37580-32-8  |
| 141 | 21.662 | 191, 57, 192  | 1511 | 2,4-Di-tert-butylphenol                                                                                                       | 96-76-4     |
| 142 | 21.685 | 189, 204, 161 | 1513 | 8-Amino-3-ethyl-7-hydroxy-4-methyl-2H-1-benzopyran-2-one                                                                      | 442128      |
| 143 | 21.707 | 97, 218, 98   | 1515 | Bicyclo[3.3.1]nonan-1-ol                                                                                                      | 15158-56-2  |
| 144 | 21.917 | 183, 198, 149 | 1531 | 4-Ethoxycarbonyloxy-3,5-dimethoxybenzoic acid                                                                                 | 18780-67-1  |
| 145 | 22.030 | 161, 134, 204 | 1540 | Naphthalene, 1,2,3,5,6,8a-hexahydro-4,7-dimethyl-1-(1-methylethyl)-, (1S-cis)-                                                | 483-76-1    |
| 146 | 22.127 | 159, 160, 129 | 1548 | Naphthalene, 1,2,3,4-tetrahydro-5,8-dimethyl-1-octyl-                                                                         | 55255-58-8  |
| 147 | 22.140 | 161, 204, 202 | 1549 | L-Alanine, N-(4-butylbenzoyl)-, tetradecyl ester                                                                              | 314157      |
| 148 | 22.291 | 220, 205, 221 | 1561 | Propan-2-ol, 1-(4-methoxy-6-methyl-5,6,7,8-tetrahydro-[1,3]dioxolo[4,5-g]isoquinolin-5-yl)-3-(2-methoxyphenyl)-               | 316543      |
| 149 | 22.391 | 69, 41, 93    | 1569 | 1,6,10-Dodecatrien-3-ol, 3,7,11-trimethyl-, (E)-                                                                              | 40716-66-3  |
| 150 | 22.405 | 157, 142, 141 | 1570 | 4-Isopropyl-6-methyl-1-methylene-1,2,3,4-tetrahydronaphthalene                                                                | 50277-34-4  |
| 151 | 22.414 | 93, 81, 59    | 1571 | Cyclohexanemethanol, 4-ethenyl- $\alpha,\alpha$ ,4-trimethyl-3-(1-methylethenyl)-, [1R-(1 $\alpha$ ,3 $\alpha$ ,4 $\beta$ )]- | 639-99-6    |
| 152 | 22.533 | 220, 205, 137 | 1580 | Benzo[b]dihydropyran, 6-hydroxy-4,4,5,7,8-pentamethyl-                                                                        | 50442-70-1  |
| 153 | 22.548 | 137, 82, 135  | 1582 | p-Methoxyphenyl-methanediol diacetate                                                                                         | 14202-31-4  |
| 154 | 22.901 | 183, 198, 168 | 1610 | 6-Isopropyl-1,4-dimethylnaphthalene                                                                                           | 489-77-0    |
| 155 | 22.995 | 220, 150, 162 | 1618 | Furan, 2,5-diphenyl-                                                                                                          | 955-83-9    |
| 156 | 23.466 | 161, 204, 119 | 1658 | Agarospirrol                                                                                                                  | 1460-73-7   |
| 157 | 23.501 | 181, 165, 196 | 1661 | 1,1-Biphenyl, 3-(1-methylethyl)-                                                                                              | 20282-30-8  |
| 158 | 23.556 | 189, 204, 133 | 1665 | 2-((2S,4aR)-4a,8-Dimethyl-1,2,3,4,4a,5,6,7-octahydronaphthalen-2-yl)propan-2-ol                                               | 117066-77-0 |
| 159 | 23.629 | 159, 220, 160 | 1671 | benzo[b]thiophene-5-carbonitrile                                                                                              | 404377      |
| 160 | 23.634 | 220, 221, 151 | 1672 | 1H-Pyrazole, 3,5-diphenyl-                                                                                                    | 1145-01-3   |
| 161 | 23.641 | 132, 131, 69  | 1672 | 3-(Hydroxyimino)-6-methylindolin-2-one                                                                                        | 107976-73-8 |
| 162 | 24.010 | 183, 198, 168 | 1704 | Naphthalene, 1,6-dimethyl-4-(1-methylethyl)-                                                                                  | 483-78-3    |
| 163 | 24.023 | 93, 119, 69   | 1705 | $\alpha$ -Bisabolol                                                                                                           | 515-69-5    |
| 164 | 24.113 | 121, 137, 239 | 1713 | 6-Aminonicotinamide                                                                                                           | 329-89-5    |

|     |        |               |      |                                                               |            |
|-----|--------|---------------|------|---------------------------------------------------------------|------------|
| 165 | 24.160 | 183, 218, 198 | 1717 | Azulene, 1,4-dimethyl-7-(1-methylethyl)-                      | 489-84-9   |
| 166 | 24.279 | 185, 200, 186 | 1727 | 2,4-Imidazolidinedione, 1,3-bis(2-hydroxyethyl)-5,5-dimethyl- | 26850-24-8 |
| 167 | 25.492 | 171, 217, 229 | 1837 | Fenharmane                                                    | 3851-30-7  |

RT: retention time; RI: retention index.

### Details on data pre-processing for the application in PDAC patients and controls.

In all files, dynamically baseline correction (DBC) was applied in ChromSpace before further analysis. DBC removes contaminant ions (e.g., column bleed or gas ions 28 and 32) and allows better identification when comparing with EI spectra libraries. A pooled QC sample file (.lsc) was deconvolved in ChromSpace and the extracted spectra and retention times (RT) were compared versus NIST 2017 library. Data were filtered by deleting non-linear, irreproducible, or contaminated metabolic features and a list with target mass to charge ratio (m/z) and RTs was compiled and imported to Gavin<sup>1</sup> for peak integration. The number of yielded VOCs after normalization and feature filtering is presented in Table S4.

The extent of the analytical variability in the datasets and its size compared to the biological variability between PDAC patients and controls was assessed by generating principal component analysis (PCA) score plots of the pooled QC and the study samples (Figure 2). Furthermore, the number of linear, reproducible, and non-contaminated VOC features in the pooled QC samples was used as well to assess the quality of the data and the effect of pre-processing steps (Table S4). Several approaches were tested and compared including internal standard (IS) correction<sup>2</sup>, total area correction and pooled QC based correction.<sup>3</sup> For internal standard correction, every VOC feature the CV% was normalized with every IS from the same sample and CV% was calculated in each case. The IS giving the lowest CV% was chosen for each feature. For total area correction, every feature of a sample was divided with the sum area of all the features of the same sample. For QC based correction, every feature was normalized with the mean peak area in the first and the last QC of every batch. The rest four QCs of every batch were normalized with the mean peak area in their corresponding batches and were used to calculate the CV% and generate PCA plots to assess the effect of this correction. In the cases that QC based correction was highlighted the optimum pre-processing strategy, the correction was re-calculated utilizing all six pooled QC samples of every batch. While IS and QC correction effect might seem overlapping, since it is impossible to have isotopically labelled analogues of each detected VOC, especially in untargeted studies, QC correction can account for the effects that IS cannot correct due to physicochemical differences between IS and VOCs. IS correction on the other hand, can very effectively correct instrumental drifts, therefore their combination is a valid option and depends on the performance of each dataset. In the polar dataset, IS correction followed by QC based correction yielded the highest number of reliable urinary VOC features (Table S4). In the non-polar dataset, IS correction outperformed all the rest approaches (Table S4). In order to have a consistent strategy in data pre-processing, IS correction followed by QC based correction was adopted for every dataset.

**Table S4. Number of reliably measured VOCs after data pre-processing and feature filtering.**

| Normalization and Filtering        | Polar Dataset | Non-polar Dataset |
|------------------------------------|---------------|-------------------|
| Initial VOC features               | 261           | 219               |
| Total area normalization           | 268           | 232               |
| QC normalization                   | 294           | 224               |
| IS correction                      | 264           | 239               |
| IS correction and QC normalization | 294           | 228               |

IS: internal standard; QC: quality control.

**Table S5. List of urinary VOCs with variable importance projection score (VIP) > 1.5.**

| No. | Compound Name                                                                  | CAS No./<br>NIST No. | VIP   | Dataset   | Increase/<br>decrease<br>in PDAC |
|-----|--------------------------------------------------------------------------------|----------------------|-------|-----------|----------------------------------|
| 1   | 1,1,4,5,6-Pentamethyl-2,3-dihydro-1H-indene                                    | 16204-67-4           | 2.781 | Polar     | ↓                                |
| 2   | 3-Pentenoic acid, 4-methyl-                                                    | 504-85-8             | 2.517 | Polar     | ↓                                |
| 3   | 2-Pentanone                                                                    | 107-87-9             | 2.397 | Polar     | ↓                                |
| 4   | Silane, diethyldifluoro-                                                       | 358-06-5             | 2.393 | Polar     | ↓                                |
| 5   | 1,1,1,3,5,5,5-Heptamethyltrisiloxane                                           | 1873-88-7            | 2.340 | Polar     | ↓                                |
| 6   | Benzoyl chloride, 4-pentyl-                                                    | 49763-65-7           | 2.334 | Polar     | ↓                                |
| 7   | Hexanal                                                                        | 66-25-1              | 2.290 | Polar     | ↓                                |
| 8   | 2,2,6-trimethyl-cyclohexanone                                                  | 2408-37-9            | 2.254 | Polar     | ↑                                |
| 9   | Benzene, (1-methylethyl)-                                                      | 98-82-8              | 2.247 | Polar     | ↓                                |
| 10  | Furan-2-carboxamide, N-butyl-N-propyl-                                         | 415641               | 2.238 | Polar     | ↓                                |
| 11  | 3-Pentenoic acid, 4-methyl-                                                    | 504-85-8             | 2.135 | Non-polar | ↓                                |
| 12  | Ethyl 2-(2-chloroacetamido)-3,3,3-trifluoro-2-(4-fluorobenzylamino)propionate  | 339352-65-7          | 2.098 | Non-polar | ↓                                |
| 13  | Plastoquinone 3                                                                | 1168-52-1            | 2.076 | Polar     | ↓                                |
| 14  | 1,3-Benzenediamine, 4-methoxy-                                                 | 615-05-4             | 1.998 | Polar     | ↑                                |
| 15  | 3-Hexanone                                                                     | 589-38-8             | 1.996 | Polar     | ↓                                |
| 16  | MethylenedioxyamphetamineN-heptafluorobutyryl deriv.                           | 156572-19-9          | 1.988 | Polar     | ↓                                |
| 17  | 1,3,5,7-Cyclooctatetraene                                                      | 629-20-9             | 1.973 | Polar     | ↓                                |
| 18  | p-Cymene                                                                       | 99-87-6              | 1.966 | Polar     | ↓                                |
| 19  | N-Chloroacetyl-dl-erythro-O-methylthreonine                                    | 214481               | 1.935 | Polar     | ↓                                |
| 20  | Hexanal                                                                        | 66-25-1              | 1.930 | Non-polar | ↓                                |
| 21  | Benzene, (1-methylethyl)- (cumene)                                             | 98-82-8              | 1.926 | Polar     | ↓                                |
| 22  | Oxepine, 2,7-dimethyl-                                                         | 1487-99-6            | 1.913 | Polar     | ↓                                |
| 23  | Phthalic acid, methyl neopentyl ester                                          | 315539               | 1.904 | Polar     | ↑                                |
| 24  | Levomenol                                                                      | 23089-26-1           | 1.900 | Non-polar | ↓                                |
| 25  | o-Isopropenyltoluene                                                           | 7399-49-7            | 1.895 | Polar     | ↓                                |
| 26  | 3-Isopropylbenzaldehyde                                                        | 34246-57-6           | 1.874 | Polar     | ↓                                |
| 27  | 4-Isopropyl-6-methyl-1-methylene-1,2,3,4-tetrahydronaphthalene                 | 50277-34-4           | 1.872 | Non-polar | ↓                                |
| 28  | 2(3H)-Furanone, 5-heptyldihydro-                                               | 104-67-6             | 1.862 | Polar     | ↑                                |
| 29  | Benzene, 1-methyl-4-(1-methylethenyl)-                                         | 1195-32-0            | 1.842 | Non-polar | ↓                                |
| 30  | 2(3H)-Furanone, 5-ethylidihydro-5-methyl-                                      | 2865-82-9            | 1.832 | Polar     | ↓                                |
| 31  | 4-Methyl-4-vinylbutyrolactone                                                  | 427992               | 1.827 | Polar     | ↓                                |
| 32  | p-Cymene                                                                       | 99-87-6              | 1.823 | Non-polar | ↓                                |
| 33  | 1-Methoxyadamantane                                                            | 6221-74-5            | 1.802 | Polar     | ↓                                |
| 34  | Styrene                                                                        | 100-42-5             | 1.802 | Non-polar | ↓                                |
| 35  | 5-Hexyn-3-ol                                                                   | 19780-84-8           | 1.783 | Non-polar | ↓                                |
| 36  | Naphthalene, 1,2,3,5,6,8a-hexahydro-4,7-dimethyl-1-(1-methylethyl)-, (1S-cis)- | 483-76-1             | 1.761 | Non-polar | ↑                                |
| 37  | Cyclopentanemethanol, $\alpha,\alpha$ -dimethyl-                               | 1462-06-2            | 1.755 | Non-polar | ↓                                |
| 38  | 5-Aminoindan                                                                   | 24425-40-9           | 1.741 | Non-polar | ↓                                |



|    |                                                                                      |             |       |           |   |
|----|--------------------------------------------------------------------------------------|-------------|-------|-----------|---|
| 39 | 2-Acetyl-6-methoxynaphthalene                                                        | 3900-45-6   | 1.738 | Non-polar | ↓ |
| 40 | dl-5-Methyltryptophan                                                                | 951-55-3    | 1.732 | Non-polar | ↑ |
| 41 | 1,2,5-Oxadiazole-3-carboxamide, 4-amino-N-[2-[[[(4-fluorophenyl)methyl]amino]ethyl]- | 337130      | 1.718 | Polar     | ↓ |
| 42 | 1-Hexanol                                                                            | 111-27-3    | 1.717 | Polar     | ↓ |
| 43 | Pyrrole                                                                              | 109-97-7    | 1.716 | Non-polar | ↓ |
| 44 | Azulene, 1,4-dimethyl-7-(1-methylethyl)-                                             | 489-84-9    | 1.710 | Polar     | ↓ |
| 45 | (2-Methoxyphenyl)carbamic acid, naphthalen-2-yl ester                                | 305153      | 1.709 | Polar     | ↑ |
| 46 | 3-Hexanone                                                                           | 589-38-8    | 1.695 | Non-polar | ↓ |
| 47 | Benzene, 1-methoxy-4-(1-methylethyl)-                                                | 4132-48-3   | 1.693 | Polar     | ↑ |
| 48 | 2-Pentanol, 2,3-dimethyl-                                                            | 4911-70-0   | 1.682 | Non-polar | ↓ |
| 49 | 1,3-Dioxolane, 2-methyl-2-pentyl-                                                    | 4352-95-8   | 1.672 | Polar     | ↓ |
| 50 | Ethyl chrysanthemate                                                                 | 97-41-6     | 1.668 | Non-polar | ↓ |
| 51 | Butylphosphonic acid, heptyl neopentyl ester                                         | 323126      | 1.647 | Non-polar | ↓ |
| 52 | Acetylhydrazide, 2-methoxy-2-phenyl-N2-(1-naphthylmethylene)-                        | 351372-17-3 | 1.640 | Non-polar | ↓ |
| 53 | Ethanol, 2-(1-methylethoxy)-                                                         | 109-59-1    | 1.634 | Polar     | ↓ |
| 54 | 7-Octen-2-ol, 2,6-dimethyl-                                                          | 18479-58-8  | 1.634 | Polar     | ↓ |
| 55 | m-Cymene, 5-tert-butyl-                                                              | 29577-19-3  | 1.627 | Non-polar | ↓ |
| 56 | 3-Pentenoic acid, 4-methyl-                                                          | 504-85-8    | 1.622 | Non-polar | ↓ |
| 57 | 3,5-Di-tert-butylbenzoic acid                                                        | 16225-26-6  | 1.602 | Non-polar | ↓ |
| 58 | Sebacic acid, 3,5-dimethylphenyl isobutyl ester                                      | 354590      | 1.593 | Polar     | ↓ |
| 59 | N-Formyl-d-threo-O-methylthreonine                                                   | 214695      | 1.592 | Non-polar | ↓ |
| 60 | Tryptamine                                                                           | 61-54-1     | 1.592 | Polar     | ↓ |
| 61 | 3-Methyl-4-propenyl-oxetan-2-one                                                     | 194652      | 1.591 | Non-polar | ↓ |
| 62 | Methyl Isobutyl Ketone                                                               | 108-10-1    | 1.585 | Polar     | ↓ |
| 63 | 4-Methyl-4-vinylbutyrolactone                                                        | 427992      | 1.582 | Non-polar | ↓ |
| 64 | Benzene, 1-ethyl-2-methyl-                                                           | 611-14-3    | 1.558 | Polar     | ↓ |
| 65 | Cyclohexene, 1,2-dimethyl-                                                           | 1674-10-8   | 1.550 | Polar     | ↓ |
| 66 | 2,3,6-Trifluorobenzyl alcohol, methyl ether                                          | 364213      | 1.543 | Non-polar | ↑ |
| 67 | 2-Pentanone, 3-ethyl-                                                                | 6137-03-7   | 1.530 | Non-polar | ↓ |
| 68 | p-Fluoroethylbenzene                                                                 | 459-47-2    | 1.515 | Polar     | ↓ |
| 69 | Terbutaline, tetrakis-trifluoroacetyl-                                               | 125319-30-4 | 1.515 | Polar     | ↓ |
| 70 | Benzene, 1,2,4,5-tetramethyl-                                                        | 95-93-2     | 1.510 | Polar     | ↓ |

## References

1. Behrends, V.; Tredwell, G. D.; Bundy, J. G., A software complement to AMDIS for processing GC-MS metabolomic data. *Anal Biochem* **2011**, *415* (2), 206-8.
2. Boysen, A. K.; Heal, K. R.; Carlson, L. T.; Ingalls, A. E., Best-Matched Internal Standard Normalization in Liquid Chromatography–Mass Spectrometry Metabolomics Applied to Environmental Samples. *Anal. Chem.* **2018**, *90* (2), 1363-1369.
3. Alonso, A.; Marsal, S.; Julia, A., Analytical methods in untargeted metabolomics: state of the art in 2015. *Front Bioeng Biotechnol* **2015**, *3*, 23.
